# Supplementary material for: Identification of Cross-Protective Potential Antigens against PathogenicBrucellaspp. through Combining Pan-Genome Analysis with Reverse Vaccinology
Source: Hindawi journal article supplement (doi:10.1155/2018/1474517), 2018-12-09
Supplement: f1 [file 1474517.f1.pdf]

| Organism/Name                        | Strain     | Replicons                                                                              | Proteins | No. of core Proteins (Intra ) | No. of core Proteins (Inter ) |
|--------------------------------------|------------|----------------------------------------------------------------------------------------|----------|-------------------------------|-------------------------------|
| Brucella melitensis bv. 1 str. 16M   | 16M        | chromosome I:NC_003317.1/AE008917.1;<br>chromosome II:NC_003318.1/AE008918.1           | 3099     |                               |                               |
| Brucella melitensis ATCC 23457       | ATCC 23457 | chromosome I:NC_012441.1/CP001488.1;<br>chromosome II:NC_012442.1/CP001489.1           | 3152     |                               |                               |
| Brucella melitensis M28              | M28        | chromosome 1:NC_017244.1/CP002459.1;<br>chromosome 2:NC_017245.1/CP002460.1            | 3144     |                               |                               |
| Brucella melitensis M5-90            | M5-90      | chromosome I:NC_017246.1/CP001851.1;<br>chromosome II:NC_017247.1/CP001852.1           | 3124     |                               |                               |
| Brucella melitensis NI               | NI         | chromosome I:NC_017248.1/CP002931.1;<br>chromosome II:NC_017283.1/CP002932.1           | 3115     |                               |                               |
| Brucella melitensis bv. 3 str. Ether | ether      | chromosome<br>1:NZ_CP007760.1/CP007760.1;<br>chromosome<br>2:NZ_CP007761.1/CP007761.1  | 3130     |                               |                               |
| Brucella melitensis bv. 1 str. 16M   | 16M        | chromosome<br>1:NZ_CP007763.1/CP007763.1;<br>chromosome<br>2:NZ_CP007762.1/CP007762.1  | 3134     | 2578                          | 1939                          |
| Brucella melitensis                  | C-573      | chromosome<br>I:NZ_CP019679.1/CP019679.1;<br>chromosome<br>II:NZ_CP019680.1/CP019680.1 | 3099     |                               |                               |
| Brucella melitensis                  | 20236      | chromosome<br>1:NZ_CP008750.1/CP008750.1;<br>chromosome<br>2:NZ_CP008751.1/CP008751.1  | 3140     |                               |                               |
| Brucella melitensis                  | 2008724259 | chromosome<br>1:NZ_CP016983.1/CP016983.1;                                              | 3125     |                               |                               |

|                     |                 |                                                                                       |      |
|---------------------|-----------------|---------------------------------------------------------------------------------------|------|
| Brucella melitensis | BwIM_AFG_6<br>3 | chromosome<br>2:NZ_CP016984.1/CP016984.1<br>chromosome<br>1:NZ_CP018478.1/CP018478.1; | 3148 |
| Brucella melitensis | BwIM_IRN_37     | chromosome<br>2:NZ_CP018479.1/CP018479.1<br>chromosome<br>1:NZ_CP018486.1/CP018486.1; | 3149 |
| Brucella melitensis | BwIM_IRQ_3<br>2 | chromosome<br>2:NZ_CP018487.1/CP018487.1<br>chromosome<br>1:NZ_CP018490.1/CP018490.1; | 3145 |
| Brucella melitensis | BwIM_ITA_45     | chromosome<br>2:NZ_CP018491.1/CP018491.1<br>chromosome<br>1:NZ_CP018494.1/CP018494.1; | 3131 |
| Brucella melitensis | BwIM_ITA_55     | chromosome<br>2:NZ_CP018495.1/CP018495.1<br>chromosome<br>1:NZ_CP018496.1/CP018496.1; | 3126 |
| Brucella melitensis | BwIM_SYR_0<br>4 | chromosome<br>2:NZ_CP018497.1/CP018497.1<br>chromosome<br>1:NZ_CP018512.1/CP018512.1; | 3149 |
| Brucella melitensis | BwIM_TKM_5<br>6 | chromosome<br>2:NZ_CP018513.1/CP018513.1<br>chromosome<br>1:NZ_CP018536.1/CP018536.1; | 3148 |
| Brucella melitensis | BwIM_TUR_0      | chromosome<br>2:NZ_CP018537.1/CP018537.1                                              | 3145 |

|                     |                 |                                                                                       |      |
|---------------------|-----------------|---------------------------------------------------------------------------------------|------|
| Brucella melitensis | 3               | 1:NZ_CP018540.1/CP018540.1;<br>chromosome<br>2:NZ_CP018541.1/CP018541.1<br>chromosome | 3146 |
| Brucella melitensis | BwIM_TUR_1<br>7 | 1:NZ_CP018544.1/CP018544.1;<br>chromosome<br>2:NZ_CP018545.1/CP018545.1<br>chromosome | 3149 |
| Brucella melitensis | BwIM_TUR_1<br>9 | 1:NZ_CP018546.1/CP018546.1;<br>chromosome<br>2:NZ_CP018547.1/CP018547.1<br>chromosome | 3147 |
| Brucella melitensis | BwIM_TUR_5<br>9 | 1:NZ_CP018560.1/CP018560.1;<br>chromosome<br>2:NZ_CP018561.1/CP018561.1<br>chromosome | 3146 |
| Brucella melitensis | BwIM_SAU_0<br>9 | 1:NZ_CP018504.1/CP018504.1;<br>chromosome<br>2:NZ_CP018505.1/CP018505.1<br>chromosome | 3145 |
| Brucella melitensis | BwIM_SYR_2<br>6 | 1:NZ_CP018526.1/CP018526.1;<br>chromosome<br>2:NZ_CP018527.1/CP018527.1<br>chromosome | 3144 |
| Brucella melitensis | BwIM_TUR_3<br>9 | 1:NZ_CP018554.1/CP018554.1;<br>chromosome<br>2:NZ_CP018555.1/CP018555.1<br>chromosome | 3058 |
| Brucella melitensis | QY1             | I:NZ_CP022204.1/CP022204.1;<br>chromosome<br>II:NZ_CP022205.1/CP022205.1              |      |

|                     |                        |                                                                                        |      |
|---------------------|------------------------|----------------------------------------------------------------------------------------|------|
| Brucella melitensis | BY38                   | chromosome<br>1:NZ_CP022827.1/CP022827.1;<br>chromosome<br>2:NZ_CP022828.1/CP022828.1  | 3141 |
| Brucella melitensis | BL                     | chromosome<br>1:NZ_CP022875.1/CP022875.1;<br>chromosome<br>2:NZ_CP022876.1/CP022876.1  | 3146 |
| Brucella melitensis | QH61                   | chromosome<br>1:NZ_CP024653.1/CP024653.1;<br>chromosome<br>2:NZ_CP024654.1/CP024654.1  | 3131 |
| Brucella melitensis | CIIMS-BH-2             | chromosome<br>I:NZ_CP025680.1/CP025680.1;<br>chromosome<br>II:NZ_CP025681.1/CP025681.1 | 3130 |
| Brucella melitensis | B3                     | chromosome<br>1:NZ_CP026005.1/CP026005.1;<br>chromosome<br>2:NZ_CP026006.1/CP026006.1  | 3117 |
| Brucella melitensis | Rev.1<br>(passage 101) | chromosome<br>I:NZ_CP024715.1/CP024715.1;<br>chromosome<br>II:NZ_CP024716.1/CP024716.1 | 3111 |
| Brucella melitensis | 1                      | chromosome<br>1:NZ_LT962928.1/LT962928.1;<br>chromosome<br>2:NZ_LT962929.1/LT962929.1  | 3120 |
| Brucella melitensis | 1                      | chromosome<br>1:NZ_LT963350.1/LT963350.1;<br>chromosome                                | 3112 |

|                     |   |                                                                                       |      |
|---------------------|---|---------------------------------------------------------------------------------------|------|
| Brucella melitensis | 1 | 2:NZ_LT963351.1/LT963351.1<br>chromosome                                              | 3120 |
| Brucella melitensis | 1 | 1:NZ_LT962945.1/LT962945.1;<br>chromosome<br>2:NZ_LT962946.1/LT962946.1<br>chromosome | 3117 |
| Brucella melitensis | 1 | 1:NZ_LT962940.1/LT962940.1;<br>chromosome<br>2:NZ_LT962941.1/LT962941.1<br>chromosome | 3104 |
| Brucella melitensis | 1 | 1:NZ_LT962947.1/LT962947.1;<br>chromosome<br>2:NZ_LT962948.1/LT962948.1<br>chromosome | 3124 |
| Brucella melitensis | 1 | 1:NZ_LT962910.1/LT962910.1;<br>chromosome<br>2:NZ_LT962911.1/LT962911.1<br>chromosome | 3119 |
| Brucella melitensis | 1 | 1:NZ_LT962943.1/LT962943.1;<br>chromosome<br>2:NZ_LT962944.1/LT962944.1<br>chromosome | 3123 |
| Brucella melitensis | 1 | 1:NZ_LT962914.1/LT962914.1;<br>chromosome<br>2:NZ_LT962915.1/LT962915.1<br>chromosome | 3122 |
| Brucella melitensis | 1 | 1:NZ_LT962926.1/LT962926.1;<br>chromosome<br>2:NZ_LT962927.1/LT962927.1<br>chromosome | 3103 |
| Brucella melitensis | 1 | 1:NZ_LT962922.1/LT962922.1;                                                           |      |

|                     |   |                                                                                       |      |
|---------------------|---|---------------------------------------------------------------------------------------|------|
| Brucella melitensis | 1 | chromosome<br>2:NZ_LT962923.1/LT962923.1                                              | 3123 |
| Brucella melitensis | 1 | chromosome<br>1:NZ_LT962916.1/LT962916.1;<br>chromosome<br>2:NZ_LT962917.1/LT962917.1 | 3121 |
| Brucella melitensis | 1 | chromosome<br>1:NZ_LT962924.1/LT962924.1;<br>chromosome<br>2:NZ_LT962925.1/LT962925.1 | 3125 |
| Brucella melitensis | 1 | chromosome<br>1:NZ_LT962912.1/LT962912.1;<br>chromosome<br>2:NZ_LT962913.1/LT962913.1 | 3116 |
| Brucella melitensis | 1 | chromosome<br>1:NZ_LT962920.1/LT962920.1;<br>chromosome<br>2:NZ_LT962921.1/LT962921.1 | 3106 |
| Brucella melitensis | 1 | chromosome<br>1:NZ_LT962918.1/LT962918.1;<br>chromosome<br>2:NZ_LT962919.1/LT962919.1 | 3108 |
| Brucella melitensis | 1 | chromosome<br>1:NZ_LT963348.1/LT963348.1;<br>chromosome<br>2:NZ_LT963349.1/LT963349.1 | 3115 |
| Brucella melitensis | 1 | chromosome<br>1:NZ_LT962930.1/LT962930.1;<br>chromosome<br>2:NZ_LT962931.1/LT962931.1 | 3120 |

|                                   |       |                                                                                                                                                         |      |      |
|-----------------------------------|-------|---------------------------------------------------------------------------------------------------------------------------------------------------------|------|------|
| Brucella melitensis               | 1     | 1:NZ_LT962932.1/LT962932.1;<br>chromosome<br>2:NZ_LT962933.1/LT962933.1<br>chromosome                                                                   | 3103 |      |
| Brucella melitensis               | 1     | 1:NZ_LT962938.1/LT962938.1;<br>chromosome<br>2:NZ_LT962939.1/LT962939.1<br>chromosome                                                                   | 3126 |      |
| Brucella melitensis               | 1     | 1:NZ_LT962934.1/LT962934.1;<br>chromosome<br>2:NZ_LT962935.1/LT962935.1<br>chromosome                                                                   | 3117 |      |
| Brucella melitensis               | 1     | 1:NZ_LT962936.1/LT962936.1;<br>chromosome<br>2:NZ_LT962937.1/LT962937.1<br>chromosome                                                                   | 3121 |      |
| Brucella melitensis               | 1     | 1:NZ_LT962953.1/LT962953.1;<br>chromosome<br>2:NZ_LT962954.1/LT962954.1<br>chromosome                                                                   | 3109 |      |
| Brucella melitensis               | 1     | 1:NZ_LT962951.1/LT962951.1;<br>chromosome<br>2:NZ_LT962952.1/LT962952.1<br>chromosome                                                                   | 3100 |      |
| Brucella abortus bv. 1 str. 9-941 | 9-941 | 1:NZ_LT962949.1/LT962949.1;<br>chromosome<br>2:NZ_LT962950.1/LT962950.1<br>chromosome I:NC_006932.1/AE017223.1;<br>chromosome II:NC_006933.1/AE017224.1 | 3153 | 2840 |
| Brucella abortus S19              | S19   | chromosome 1:NC_010742.1/CP000887.1;<br>chromosome 2:NC_010740.1/CP000888.1                                                                             | 3151 |      |

|                                 |            |                                                                                       |      |
|---------------------------------|------------|---------------------------------------------------------------------------------------|------|
| Brucella abortus 2308           | 2308       | chromosome I:NC_007618.1/AM040264.1;<br>chromosome II:NC_007624.1/AM040265.1          | 3153 |
| Brucella abortus A13334         | A13334     | chromosome 1:NC_016795.1/CP003176.1;<br>chromosome 2:NC_016777.1/CP003177.1           | 3168 |
| Brucella abortus                | BDW        | chromosome<br>1:NZ_CP007681.1/CP007681.1;<br>chromosome<br>2:NZ_CP007680.1/CP007680.1 | 3171 |
| Brucella abortus                | BER        | chromosome<br>1:NZ_CP007682.1/CP007682.1;<br>chromosome<br>2:NZ_CP007683.1/CP007683.1 | 3130 |
| Brucella abortus                | NCTC 10505 | chromosome<br>1:NZ_CP007700.1/CP007700.1;<br>chromosome<br>2:NZ_CP007701.1/CP007701.1 | 3140 |
| Brucella abortus bv. 9 str. C68 | C68        | chromosome<br>1:NZ_CP007705.1/CP007705.1;<br>chromosome<br>2:NZ_CP007706.1/CP007706.1 | 3150 |
| Brucella abortus bv. 6 str. 870 | 870        | chromosome<br>1:NZ_CP007709.1/CP007709.1;<br>chromosome<br>2:NZ_CP007710.1/CP007710.1 | 3142 |
| Brucella abortus                | 63 75      | chromosome<br>1:NZ_CP007663.1/CP007663.1;<br>chromosome<br>2:NZ_CP007662.1/CP007662.1 | 3147 |
| Brucella abortus                | BFY        | chromosome<br>1:NZ_CP007738.1/CP007738.1;<br>chromosome                               | 3127 |



|                                        |            |                                                                                                                                                                                 |      |      |
|----------------------------------------|------------|---------------------------------------------------------------------------------------------------------------------------------------------------------------------------------|------|------|
| Brucella abortus bv. 2 str.<br>86/8/59 | 86/8/59    | 2:NZ_CP007737.1/CP007737.1<br>chromosome                                                                                                                                        | 3159 |      |
| Brucella abortus                       | BAB8416    | 1:NZ_CP007765.1/CP007765.1;<br>chromosome<br>2:NZ_CP007764.1/CP007764.1<br>chromosome                                                                                           | 3121 |      |
| Brucella abortus 104M                  | 104M       | 1:NZ_CP008774.1/CP008774.1;<br>chromosome<br>2:NZ_CP008775.1/CP008775.1<br>chromosome                                                                                           | 3152 |      |
| Brucella abortus                       | BD         | 1:NZ_CP009625.1/CP009625.1;<br>chromosome<br>2:NZ_CP009626.1/CP009626.1<br>chromosome                                                                                           | 3115 |      |
| Brucella abortus                       | MC         | 1:NZ_CP022877.1/CP022877.1;<br>chromosome<br>2:NZ_CP022878.1/CP022878.1<br>chromosome                                                                                           | 3109 |      |
| Brucella abortus                       | B4         | 1:NZ_CP022879.1/CP022879.1;<br>chromosome<br>2:NZ_CP022880.1/CP022880.1<br>chromosome<br>I:NZ_CP025743.1/CP025743.1;<br>chromosome<br>II:NZ_CP025744.1/CP025744.1<br>chromosome | 3123 |      |
| Brucella suis 1330                     | 1330       | chromosome I:NC_004310.3/AE014291.4;<br>chromosome II:NC_004311.2/AE014292.2                                                                                                    | 3161 | 2484 |
| Brucella suis ATCC 23445               | ATCC 23445 | chromosome I:NC_010169.1/CP000911.1;<br>chromosome II:NC_010167.1/CP000912.1                                                                                                    | 3158 | 2484 |
| Brucella suis 1330                     | 1330       | chromosome I:NC_017251.1/CP002997.1;<br>chromosome II:NC_017250.1/CP002998.1                                                                                                    | 3164 | 2484 |

|                              |           |                                                                                        |      |      |
|------------------------------|-----------|----------------------------------------------------------------------------------------|------|------|
| Brucella suis VBI22          | VBI22     | chromosome I:NC_016797.1/CP003128.1;<br>chromosome II:NC_016775.1/CP003129.1           | 3167 | 2484 |
| Brucella suis bv. 1 str. S2  | S2        | chromosome<br>I:NZ_CP006961.1/CP006961.1;<br>chromosome<br>II:NZ_CP006962.1/CP006962.1 | 3167 | 2484 |
| Brucella suis bv. 2          | PT09143   | chromosome<br>I:NZ_CP007691.1/CP007691.1;<br>chromosome<br>II:NZ_CP007692.1/CP007692.1 | 3162 | 2484 |
| Brucella suis bv. 2          | PT09172   | chromosome<br>I:NZ_CP007693.1/CP007693.1;<br>chromosome<br>II:NZ_CP007694.1/CP007694.1 | 3162 | 2484 |
| Brucella suis bv. 2          | Bs364CITA | chromosome<br>I:NZ_CP007697.1/CP007697.1;<br>chromosome<br>II:NZ_CP007698.1/CP007698.1 | 3163 | 2484 |
| Brucella suis bv. 2          | Bs396CITA | chromosome<br>I:NZ_CP007720.1/CP007720.1;<br>chromosome<br>II:NZ_CP007721.1/CP007721.1 | 3164 | 2484 |
| Brucella suis bv. 2          | Bs143CITA | chromosome<br>I:NZ_CP007695.1/CP007695.1;<br>chromosome<br>II:NZ_CP007696.1/CP007696.1 | 3162 | 2484 |
| Brucella suis                | 513UK     | chromosome<br>1:NZ_CP007717.1/CP007717.1;<br>chromosome<br>2:NZ_CP007716.1/CP007716.1  | 3165 | 2484 |
| Brucella suis bv. 3 str. 686 | 686       | chromosome                                                                             | 3121 | 2484 |

|               |                  |                                                                                                 |      |      |
|---------------|------------------|-------------------------------------------------------------------------------------------------|------|------|
| Brucella suis | BSP              | 1:NZ_CP007719.1/CP007719.1;<br>chromosome<br>2:NZ_CP007718.1/CP007718.1<br>chromosome           | 3153 | 2484 |
| Brucella suis | Human/AR/US/1981 | 1:NZ_CP008757.1/CP008757.1;<br>chromosome<br>2:NZ_CP008756.1/CP008756.1<br>chromosome           | 3164 | 2484 |
| Brucella suis | 2004000577       | I:NZ_CP010850.1/CP010850.1;<br>chromosome<br>II:NZ_CP010851.1/CP010851.1<br>chromosome          | 3154 | 2484 |
| Brucella suis | QH05             | 1:NZ_CP016981.1/CP016981.1;<br>chromosome<br>2:NZ_CP016982.1/CP016982.1<br>chromosome           | 3151 | 2484 |
| Brucella suis | ZW046            | 1:NZ_CP024420.1/CP024420.1;<br>chromosome<br>2:NZ_CP024421.1/CP024421.1<br>chromosome           | 3124 | 2484 |
| Brucella suis | ZW043            | 1:CP009096.1; chromosome<br>2:CP009097.1<br>chromosome 1:CP009094.1; chromosome<br>2:CP009095.1 | 3090 | 2484 |
