# Supplementary material for: Identification of Cross-Protective Potential Antigens against Pathogenic Brucella spp. through Combining Pan-Genome Analysis with Reverse Vaccinology
Source: J Immunol Res. 2018 Dec 9;2018:1474517. doi: 10.1155/2018/1474517 (PMC6304850; doi:10.1155/2018/1474517)
Supplement: Supplementary 2 — This Excel file contains the 177 surface-associated proteins resulted from our SCL prediction pipeline. The prediction results of 6 SCL tools used in the pipeline are shown. [file 1474517.f2.xlsx]

## Sheet: 177proteins
Protien Info			SCL-Pipeline
NCBI ID	Length	Description	Psortb	SosuiGramN	Cello	ngLoc	ClubSub-P	MetaLoc
WP_002966516.1	57	type IV secretion system lipoprotein virB7	unKnown	unKnown	P	Cyt/IM	unKnown	OM 42.92%.
WP_002971893.1	60	hypothetical protein	unKnown	OM	Cyt	Cyt/IM	OM
WP_002970216.1	62	hypothetical protein	unKnown	P	P
WP_006135036.1	71	DNA gyrase inhibitor YacG	unKnown	P	P
WP_006189877.1	78	hypothetical protein	unKnown	P	P
WP_002963878.1	82	hypothetical protein	unKnown	P	P
WP_002964124.1	90	hypothetical protein	unKnown	P	P
WP_002968043.1	93	hypothetical protein	IM	P	P
WP_004686827.1	94	pentapeptide MXKDX repeat protein	unKnown	P	P
WP_002971526.1	98	hypothetical protein	unKnown	P	P
WP_002964730.1	105	hypothetical protein	unKnown	P	P
WP_002964559.1	107	DUF2293 domain-containing protein	unKnown	P	P
WP_004681873.1	108	hypothetical protein	unKnown	OM	P
WP_002963717.1	111	hypothetical protein	unKnown	P	P
WP_002964582.1	114	hypothetical protein	unKnown	P	P
WP_002966248.1	114	acid stress chaperone HdeA	unKnown	P	P
WP_002963776.1	115	DUF2147	unKnown	P	P
WP_002964396.1	115	hypothetical protein	P	P	P
WP_002966091.1	115	hypothetical protein	unKnown	P	P
WP_002965199.1	118	septal ring lytic transglycosylase RlpA family protein	unKnown	P	P
WP_002963597.1	121	hypothetical protein	OM	P	P
WP_006168377.1	123	30S ribosomal protein S12	Cyt	P	P
WP_002966502.1	126	hypothetical protein	OM	OM	Ex
WP_004686521.1	127	TIGR02301 family protein	unKnown	P	P
WP_002965104.1	131	DUF4354 domain-containing protein	unKnown	P	P
WP_002966353.1	131	hypothetical protein	unKnown	P	P
WP_002968479.1	131	hypothetical protein	IM	P	P
WP_002966407.1	131	Cytchrome c family protein	P	P	P
WP_002963970.1	133	hypothetical protein	unKnown	P	P
WP_004686362.1	134	hypothetical protein	unKnown	P	P
WP_004690392.1	135	hypothetical protein	unKnown	P	P
WP_002963960.1	137	hypothetical protein	unKnown	P	P
WP_004681387.1	138	DUF2195 domain-containing protein	unKnown	P	P
WP_002966303.1	146	pseudoazurin [Brucella]	P	unKnown	P
WP_002966682.1	151	hypothetical protein	unKnown	P	P
WP_004683280.1	154	hypothetical protein	unKnown	P	P
WP_002969562.1	155	hypothetical protein	IM	P	P
WP_002966352.1	156	DUF2271 domain-containing protein	unKnown	OM	P
WP_002963473.1	160	CAP domain-containing protein	unKnown	P	P
WP_002972060.1	165	DUF995 domain-containing protein	unKnown	P	P
WP_002967296.1	166	BA14K family protein	unKnown	P	P
WP_002966257.1	166	hypothetical protein	unKnown	P	P
WP_002971481.1	168	outer membrane protein assembly factor BamE	unKnown	P	P
WP_002966947.1	168	hypothetical protein	OM	OM	OM
WP_002964622.1	170	BA14K family protein	unKnown	P	P
WP_004689960.1	172	type IV secretion system protein [Brucella] VirB12	unKnown	P	P
WP_002972093.1	173	superoxide dismutase [Cu-Zn]	P	P	P
WP_002964998.1	177	hypothetical protein	OM	P	Ex
WP_002971445.1	177	hypothetical protein	unKnown	P	P
WP_002966306.1	179	hypothetical protein	unKnown	P	P
WP_002964988.1	180	hypothetical protein	unKnown	P	P
WP_004689355.1	181	hypothetical protein	unKnown	P	P
WP_002966226.1	182	hypothetical protein	unKnown	P	P
WP_006154070.1	184	hypothetical protein	unKnown	OM	P	Cyt	P
WP_002964648.1	187	ubiquinol-Cytchrome c reductase iron-sulfur subunit	IM	P	P
WP_004685190.1	190	lytic transglycosylase domain-containing protein	unKnown	P	P
WP_004688070.1	192	hypothetical protein	unKnown	Ex	OM	IM	OM
WP_002967573.1	193	NADH-quinone oxidoreductase subunit B	IM	P	P
WP_002964883.1	193	hypothetical protein	unKnown	P	OM	Cyt	OM
WP_002963919.1	195	polysaccharide export protein	unKnown	P	OM
WP_002964222.1	196	peptidyl-prolyl cis-trans isomerase	P	P	P
WP_004684011.1	196	SCO family protein	unKnown	P	P
WP_004690660.1	199	superoxide dismutase	P	Cyt	P
WP_004684614.1	202	Cytchrome c family protein	IM	P	P
WP_002963732.1	203	DUF1214 domain-containing protein	unKnown	P	P
WP_002971565.1	203	pyridoxine/pyridoxamine 5'-phosphate oxidase	P	unKnown	P
WP_002967079.1	203	DsbE family thiol:disulfide interchange protein	P	P	P
WP_004686596.1	204	DsbA family protein	unKnown	P	P
WP_002971243.1	205	invasion associated locus B family protein	unKnown	P	P
WP_004686655.1	206	L,D-transpeptidase	unKnown	P	P
WP_004683722.1	207	hypothetical protein	P	P	P
WP_002968302.1	207	lipase	unKnown	P	P
WP_002963624.1	208	invasion associated locus B family protein	unKnown	P	P
WP_002964140.1	209	ABC transporter	unKnown	P	OM
WP_004683944.1	212	porin family protein	OM	OM	Ex
WP_004683466.1	213	membrane protein	OM	OM	OM
WP_002963780.1	216	hypothetical protein	unKnown	P	P
WP_004691352.1	216	organic solvent tolerance protein OstA	unKnown	OM	P	Cyt	P
WP_002971551.1	217	DsbA family protein	unKnown	P	P
WP_004682501.1	218	peptide-methionine (S)-S-oxide reductase	unKnown	P	P
WP_002964333.1	220	OmpA family protein	IM	OM	OM
WP_002971287.1	223	hypothetical protein	unKnown	P	P
WP_002964666.1	227	OmpW family protein	OM	OM	P
WP_002967534.1	229	ribonuclease T(2)	P	P	P
WP_002966482.1	234	DUF1007 domain-containing protein	unKnown	Cyt	P	IM	P
WP_004683739.1	236	porin family protein	OM	OM	OM
WP_004681227.1	238	type IV secretion system protein virB1	unKnown	P	P
WP_002966514.1	238	type IV secretion system protein virB5	unKnown	OM	P
WP_002966517.1	239	type IV secretion system protein virB8	unKnown	OM	OM
WP_002965297.1	241	L,D-transpeptidase	unKnown	P	P
WP_002965333.1	241	arylesterase	P	P	P
WP_002971753.1	244	DUF1223 domain-containing protein	unKnown	Cyt	P	OM	P
WP_002964581.1	250	SIMPL domain-containing protein	P	OM	P
WP_004689974.1	251	molybdate ABC transporter substrate-binding protein	P	P	P
WP_002964476.1	252	DUF4198 domain-containing protein	unKnown	P	P
WP_002963812.1	254	hypothetical protein	unKnown	OM	P
WP_004681957.1	257	amino acid ABC transporter substrate-binding protein	P	P	P
WP_002964719.1	261	porin family protein	OM	OM	OM
WP_006278325.1	261	hypothetical protein	unKnown	P	P
WP_004690620.1	266	hypothetical protein	unKnown	P	P
WP_002971090.1	267	hypothetical protein	unKnown	OM	OM
WP_004684144.1	274	porin family protein	unKnown	OM	OM
WP_004682863.1	280	amino acid ABC transporter	P	P	P
WP_002966849.1	280	DUF1849 domain-containing protein	unKnown	P	P
WP_004690357.1	284	hypothetical protein	OM	OM	OM
WP_002964174.1	284	3-mercaptopyruvate sulfurtransferase	P	Cyt	P
WP_002964530.1	287	outer membrane protein assembly factor BamD	OM	P	Cyt	Cyt	OM 54.64%.
WP_004686020.1	288	glycine/betaine ABC transporter substrate-binding protein	unKnown	P	P
WP_004686339.1	295	Cytchrome c1 family protein	P	P	P
WP_004685781.1	303	extensin	unKnown	Cyt	P	unKnown	OM	OM 39.37%.
WP_004681548.1	306	formylglycine-generating enzyme family protein	P	P	P
WP_002971682.1	309	ABC transporter substrate-binding protein	IM	P	P
WP_002966164.1	314	hemolysin secretion protein D	IM	OM	P	Cyt	OM
WP_002969381.1	314	penicillin-insensitive murein endopeptidase	P	P	P
WP_002965965.1	315	iron ABC transporter substrate-binding protein	P	unKnown	P
WP_004691921.1	318	molecular chaperone SurA	unKnown	P	P
WP_002965661.1	319	mononuclear molybdenum enzyme YedY	unKnown	P	P
WP_002964322.1	329	hypothetical protein	unKnown	P	P
WP_002967978.1	331	peptidylprolyl isomerase	IM	P	P
WP_004684204.1	334	thiamine-binding periplasmic protein	P	P	P
WP_002965301.1	334	DUF1775 domain-containing protein	unKnown	P	P
WP_006191074.1	340	cell wall hydrolase	unKnown	P	P
WP_002963881.1	343	amino acid ABC transporter substrate-binding protein	P	Ex	OM
WP_002965202.1	348	phosphonate ABC transporter substrate-binding protein	IM	P	P
WP_004684153.1	350	sel1 repeat family protein	unKnown	P	P
WP_002964611.1	351	DUF1176 domain-containing protein	unKnown	OM	P
WP_004686075.1	355	BMP family ABC transporter substrate-binding protein	unKnown	P	P
WP_006132773.1	355	glycoside hydrolase family 43	IM	OM	OM
WP_004689211.1	356	hypothetical protein	P	P	P
WP_004691678.1	363	ABC transporter substrate-binding protein	P	P	Cyt
WP_004681306.1	367	iron ABC transporter substrate-binding protein	unKnown	P	P
WP_002968345.1	368	peptidase S58 family protein	P	unKnown	P
WP_002965732.1	368	efflux RND transporter periplasmic adaptor subunit	unKnown	P	Cyt	Cyt	OM	OM 39.53%
WP_004685038.1	372	cystathionine gamma-synthase	unKnown	P	P
WP_002966326.1	376	nitrite reductase, copper-containing	P	P	P
WP_002964109.1	396	D-alanyl-D-alanine carboxypeptidase	IM	P	P
WP_004690733.1	398	hypothetical protein	unKnown	P	P
WP_004691134.1	403	hypothetical protein	unKnown	P	P
WP_004688921.1	403	branched-chain amino acid ABC transporter substrate-binding protein	P	P	OM
WP_004682068.1	411	sugar ABC transporter substrate-binding protein	P	P	P
WP_004690137.1	415	sugar ABC transporter substrate-binding protein	unKnown	unKnown	OM	Cyt	P	OM 39.06%
WP_004681076.1	421	ABC transporter substrate-binding protein	P	P	P
WP_002968069.1	427	lytic murein transglycosylase	IM	P	P
WP_004690579.1	429	cell wall hydrolase	P	unKnown	P
WP_004686494.1	433	amidase	unKnown	P	P
WP_002965482.1	439	sugar ABC transporter substrate-binding protein	unKnown	P	P
WP_002964915.1	442	S41 family peptidase	IM	P	P
WP_002964785.1	443	protein TolB	P	OM	OM
WP_002966309.1	464	nitrous oxide reductase family maturation protein NosD	P	P	P
WP_002969408.1	471	M48 family peptidase	unKnown	P	P
WP_002964782.1	488	tol-pal system protein YbgF	OM	P	P
WP_004684782.1	492	ABC transporter substrate-binding protein	P	P	P
WP_004686294.1	493	metalloprotease	unKnown	P	OM
WP_004686222.1	494	GMC family oxidoreductase	IM	P	P
WP_002966234.1	499	catalase	P	P	P
WP_002968232.1	512	hypothetical protein	OM	Cyt	OM
WP_002963760.1	513	DegP-like serine endoprotease	P	P	P
WP_004685925.1	518	ABC transporter substrate-binding protein	P	unKnown	Cyt	Cyt	P	P 41.94%
WP_004688535.1	524	DegQ family serine endoprotease	P	unKnown	Cyt	P	P
WP_002966094.1	525	peptide ABC transporter substrate-binding protein	P	Ex	P
WP_004681740.1	527	peptide ABC transporter substrate-binding protein	P	P	P
WP_002965856.1	537	ABC transporter substrate-binding protein	P	Cyt	P
WP_006133510.1	539	ABC transporter substrate-binding protein	P	unKnown	P
WP_002963770.1	563	electron transfer flavoprotein-ubiquinone oxidoreductase	unKnown	P	P
WP_002963823.1	577	M23 family peptidase	unKnown	P	P
WP_004686326.1	586	hypothetical protein	OM	OM	OM
WP_002965256.1	615	ABC transporter substrate-binding protein	P	unKnown	P
WP_004691650.1	620	TonB-dependent receptor	OM	OM	OM
WP_004684597.1	622	ABC transporter substrate-binding protein	P	OM	P
WP_002971772.1	639	outer membrane protein assembly factor	OM	OM	OM
WP_002964936.1	651	M23 family peptidase	Cyt	OM	OM
WP_005974736.1	653	DUF882 domain-containing protein	unKnown	P	P
WP_023080793.1	661	heme transporter BhuA	OM	OM	OM
WP_002971180.1	761	penicillin amidase	P	P	Cyt
WP_011068938.1	792	LPS-assembly protein LptD	OM	OM	OM
WP_006133056.1	1579	translocation/assembly module TamB	unKnown	IM	OM	Cyt	unKnown	OM 52.36%
WP_006139398.1	1582	kinesin	unKnown	OM	OM
