# Supplementary material for: Identification of Cross-Protective Potential Antigens against Pathogenic Brucella spp. through Combining Pan-Genome Analysis with Reverse Vaccinology
Source: J Immunol Res. 2018 Dec 9;2018:1474517. doi: 10.1155/2018/1474517 (PMC6304850; doi:10.1155/2018/1474517)
Supplement: Supplementary 4 — This Excel file contains the detailed calculation of the immunogenicity cumulative score that was derived from overall protein antigenicity, MHC-I density, MHC-II density, allele coverage, and B-cell density. In addition, it shows the results of conserved domain search and annotation results of the three tools: Blannotator, Pannzer, and eggNOG of the top 34 proteins. [file 1474517.f4.xlsx]

## Sheet: Oveall Score
NCBI ID	Length	NCBI-Description	Adhesion Probability (vaxign)	Overall Antigenicity	MHC-I Density	MHC-II Density	Allele coverage	Overall B cell Density	Score of 5
WP_004684144.1	274	porin family protein	0.59	0.694461	0.960374	0.939789	1	0.969894	4.56452
WP_002964666.1	227	OmpW family protein	0.558	0.802878	1	0.812266	1	0.906133	4.52128
WP_002969562.1	155	hypothetical protein	0.544	0.754199	0.920436	0.887055	1	0.943527	4.50522
WP_002966849.1	280	DUF1849 domain-containing protein	0.6	0.68963	0.933001	0.919651	1	0.959825	4.50211
WP_002964611.1	351	DUF1176 domain-containing protein	0.546	0.693373	1.02428	0.815138	1	0.907569	4.44036
WP_004690357.1	284	porin family protein	0.553	0.750299	0.937721	0.822744	1	0.911372	4.42214
WP_004681227.1	238	type IV secretion system protein virB1	0.666	0.62248	0.921811	0.904958	0.989796	0.947377	4.38642
WP_002966226.1	182	hypothetical protein	0.54	0.430011	0.951117	1	1	1	4.38113
WP_002963597.1	121	hypothetical protein	0.502	0.726631	1.01138	0.768487	0.989796	0.879141	4.37544
WP_004688070.1	192	hypothetical protein	0.596	0.756313	0.898277	0.782342	1	0.891171	4.3281
WP_002966502.1	126	hypothetical protein	0.627	0.730402	0.890729	0.801067	1	0.900534	4.32273
WP_002964322.1	329	hypothetical protein	0.592	0.630946	0.992554	0.741615	1	0.870807	4.23592
WP_002971090.1	267	hypothetical protein	0.547	0.695433	0.971303	0.705461	1	0.85273	4.22493
WP_004691650.1	620	TonB-dependent receptor	0.537	0.813518	0.962367	0.629399	1	0.814699	4.21998
WP_002971481.1	168	outer membrane protein assembly factor BamE	0.693	0.843703	0.913375	0.6623	0.979592	0.820946	4.21992
WP_004683739.1	236	porin family protein	0.562	0.679882	0.93231	0.734143	1	0.867071	4.21341
WP_004691134.1	403	hypothetical protein	0.623	0.806489	0.85278	0.660656	1	0.830328	4.15025
WP_002965482.1	439	sugar ABC transporter substrate-binding protein	0.557	0.660534	0.941729	0.682516	0.989796	0.836156	4.11073
WP_002964333.1	220	OmpA family protein	0.562	0.847285	0.985703	0.516594	0.989796	0.753195	4.09257
WP_023080793.1	661	heme transporter BhuA	0.518	0.736523	0.897878	0.615608	1	0.807804	4.05781
WP_002964719.1	261	porin family protein	0.57	0.692905	0.923179	0.618147	1	0.809073	4.0433
WP_002966352.1	156	DUF2271 domain-containing protein	0.701	0.878095	0.955182	0.499272	0.959184	0.729228	4.02096
WP_004690579.1	429	cell wall hydrolase	0.514	0.559938	0.894213	0.70213	1	0.851065	4.00735
WP_004683944.1	212	porin family protein	0.62	0.903549	0.867371	0.483604	0.989796	0.7367	3.98102
WP_011068938.1	792	LPS-assembly protein LptD	0.509	0.557742	0.7958	0.718495	1	0.859247	3.93129
WP_002967296.1	166	BA14K family protein	0.602	0.521034	0.679915	0.818698	1	0.909349	3.929
WP_002964622.1	170	BA14K family protein	0.588	0.764829	0.738515	0.621783	0.989796	0.805789	3.92071
WP_004683466.1	213	membrane protein	0.55	0.555717	0.943675	0.604465	1	0.802233	3.90609
WP_002963776.1	115	DUF2147	0.609	0.810198	0.865655	0.559787	0.918367	0.739077	3.89309
WP_004681306.1	367	iron ABC transporter substrate-binding protein	0.516	0.731084	0.92261	0.489416	1	0.744708	3.88782
WP_002964998.1	177	hypothetical protein	0.679	0.813701	0.870514	0.399625	0.959184	0.679404	3.72243
WP_002964530.1	287	outer membrane protein assembly factor BamD	0.526	0.73148	0.923501	0.359996	1	0.679998	3.69497
WP_006278325.1	261	hypothetical protein	0.502	0.688764	0.789561	0.496344	0.979592	0.737968	3.69223
WP_002963780.1	216	hypothetical protein	0.706	0.833965	0.848373	0.342188	0.928571	0.63538	3.58848

## Sheet: Analysis
NCBI ID	Length	NCBI-Description	Adhesion Probability (vaxign)	Protein Antigenicity (ANTIGENpro)	Protein Antigenicity (VaxiJen)	MHC-I (Propred I) No. of Alleles in query	MHC-I Density (Sum epitopes/47 (Alleles)/length)	MHC-II (Propred II) No. of Alleles in query	MHC-II Density (Sum epitopes/47 (Alleles)/length)	B-Cell Density (BCPred) Density:N/length		B-Cell Density (AAP) Density:N/length
WP_002963780.1	216	hypothetical protein	0.706	0.902746	0.6967	47/47	0.0284673	44/51	0.00844227	5	0.0231481	6	0.0277778
WP_002966352.1	156	DUF2271 domain-containing protein	0.701	0.882738	0.8005	47/47	0.0320513	47/51	0.0123177	4	0.025641	4	0.025641
WP_002971481.1	168	outer membrane protein assembly factor BamE	0.693	0.916867	0.7013	47/47	0.0306484	49/51	0.0163399	4	0.0238095	4	0.0238095
WP_002964998.1	177	hypothetical protein	0.679	0.931412	0.6298	46/47	0.0292102	48/51	0.00985931	5	0.0282486	5	0.0282486
WP_004681227.1	238	type IV secretion system protein virB1	0.666	0.776825	0.4183	46/47	0.0309315	51/51	0.0223266	7	0.0294118	6	0.0252101
WP_002966502.1	126	hypothetical protein	0.627	0.958819	0.4441	47/47	0.0298886	51/51	0.0197635	2	0.015873	3	0.0238095
WP_004691134.1	403	hypothetical protein	0.623	0.95578	0.592	47/47	0.0286152	51/51	0.0162993	10	0.0248139	9	0.0223325
WP_004683944.1	212	porin family protein	0.62	0.941443	0.791	47/47	0.0291048	50/51	0.0119312	5	0.0235849	5	0.0235849
WP_002963776.1	115	DUF2147	0.609	0.89195	0.6621	45/47	0.0290472	45/51	0.0138107	2	0.0173913	3	0.026087
WP_002967296.1	166	BA14K family protein	0.602	0.532994	0.4659	47/47	0.0228147	51/51	0.0201984	4	0.0240964	4	0.0240964
WP_002966849.1	280	DUF1849 domain-containing protein	0.6	0.902471	0.4221	47/47	0.031307	51/51	0.0226891	4	0.0142857	7	0.025
WP_004688070.1	192	hypothetical protein	0.596	0.896893	0.5546	47/47	0.0301418	51/51	0.0193015	4	0.0208333	6	0.03125
WP_002964322.1	329	hypothetical protein	0.592	0.5	0.7078	47/47	0.0333053	51/51	0.0182967	5	0.0151976	8	0.0243161
WP_004684144.1	274	porin family protein	0.59	0.695898	0.6353	47/47	0.0322255	51/51	0.0231859	9	0.0328467	7	0.0255474
WP_002964622.1	170	BA14K family protein	0.588	0.814179	0.6525	47/47	0.024781	50/51	0.0153403	3	0.0176471	4	0.0235294
WP_002964719.1	261	porin family protein	0.57	0.643178	0.6844	47/47	0.0309774	51/51	0.0152505	4	0.0153257	3	0.0114943
WP_002964333.1	220	OmpA family protein	0.562	0.909901	0.715	47/47	0.0330754	50/51	0.0127451	4	0.0181818	5	0.0227273
WP_004683739.1	236	porin family protein	0.562	0.758413	0.5458	47/47	0.0312838	51/51	0.0181123	4	0.0169492	6	0.0254237
WP_002964666.1	227	OmpW family protein	0.558	0.964208	0.5768	47/47	0.0335552	51/51	0.0200397	3	0.0132159	3	0.0132159
WP_002965482.1	439	sugar ABC transporter substrate-binding protein	0.557	0.800794	0.4671	47/47	0.0315999	50/51	0.0168386	9	0.0205011	10	0.022779
WP_004690357.1	284	porin family protein	0.553	0.669913	0.7673	47/47	0.0314654	51/51	0.0202983	9	0.0316901	5	0.0176056
WP_004683466.1	213	membrane protein	0.55	0.240098	0.8212	47/47	0.0316652	51/51	0.014913	3	0.0140845	6	0.028169
WP_002971090.1	267	hypothetical protein	0.547	0.671545	0.6612	47/47	0.0325922	51/51	0.0174047	6	0.0224719	6	0.0224719
WP_002964611.1	351	DUF1176 domain-containing protein	0.546	0.793744	0.5366	47/47	0.0343699	51/51	0.0201106	7	0.019943	8	0.022792
WP_002969562.1	155	hypothetical protein	0.544	0.809882	0.6365	47/47	0.0308854	51/51	0.0218849	2	0.0129032	3	0.0193548
WP_002966226.1	182	hypothetical protein	0.54	0.335187	0.4879	47/47	0.0319149	51/51	0.0246714	5	0.0274725	5	0.0274725
WP_004691650.1	620	TonB-dependent receptor	0.537	0.905643	0.6549	47/47	0.0322924	51/51	0.0155281	13	0.0209677	13	0.0209677
WP_002964530.1	287	outer membrane protein assembly factor BamD	0.526	0.650735	0.7504	47/47	0.0309882	51/51	0.0088816	4	0.0139373	6	0.0209059
WP_023080793.1	661	heme transporter BhuA	0.518	0.811642	0.6011	47/47	0.0301284	51/51	0.0151879	18	0.0272315	14	0.02118
WP_004681306.1	367	iron ABC transporter substrate-binding protein	0.516	0.923882	0.4799	47/47	0.0309583	51/51	0.0120746	7	0.0190736	10	0.027248
WP_004690579.1	429	cell wall hydrolase	0.514	0.672117	0.4026	47/47	0.0300055	51/51	0.0173225	10	0.02331	9	0.020979
WP_011068938.1	792	LPS-assembly protein LptD	0.509	0.756992	0.3146	47/47	0.0267032	51/51	0.0177263	14	0.0176768	13	0.0164141
WP_002963597.1	121	hypothetical protein	0.502	0.88846	0.5064	47/47	0.033937	50/51	0.0189596	1	0.00826446	3	0.0247934
WP_006278325.1	261	hypothetical protein	0.502	0.785869	0.5356	46/47	0.0264938	50/51	0.0122455	7	0.0268199	7	0.0268199

## Sheet: Cumulative Antigenicity 
NCBI ID	Length	NCBI-Description	Adhesion Probability (vaxign)	Protein Antigenicity (ANTIGENpro)	Protein Antigenicity (VaxiJen)	ANTIGENpro normalization	VaxiJen normalization	overall antigenicity
WP_002963780.1	216	hypothetical protein	0.706	0.902746	0.6967	0.936256	0.731674	0.833965
WP_002966352.1	156	DUF2271 domain-containing protein	0.701	0.882738	0.8005	0.915506	0.840685	0.878095
WP_002971481.1	168	outer membrane protein assembly factor BamE	0.693	0.916867	0.7013	0.950902	0.736505	0.843703
WP_002964998.1	177	hypothetical protein	0.679	0.931412	0.6298	0.965987	0.661416	0.813701
WP_004681227.1	238	type IV secretion system protein virB1	0.666	0.776825	0.4183	0.805661	0.439298	0.62248
WP_002966502.1	126	hypothetical protein	0.627	0.958819	0.4441	0.994411	0.466394	0.730402
WP_004691134.1	403	hypothetical protein	0.623	0.95578	0.592	0.991259	0.621718	0.806489
WP_004683944.1	212	porin family protein	0.62	0.941443	0.791	0.97639	0.830708	0.903549
WP_002963776.1	115	DUF2147	0.609	0.89195	0.6621	0.92506	0.695337	0.810198
WP_002967296.1	166	BA14K family protein	0.602	0.532994	0.4659	0.552779	0.489288	0.521034
WP_002966849.1	280	DUF1849 domain-containing protein	0.6	0.902471	0.4221	0.935971	0.443289	0.68963
WP_004688070.1	192	hypothetical protein	0.596	0.896893	0.5546	0.930186	0.582441	0.756313
WP_002964322.1	329	hypothetical protein	0.592	0.5	0.7078	0.51856	0.743331	0.630946
WP_004684144.1	274	porin family protein	0.59	0.695898	0.6353	0.72173	0.667192	0.694461
WP_002964622.1	170	BA14K family protein	0.588	0.814179	0.6525	0.844402	0.685255	0.764829
WP_002964719.1	261	porin family protein	0.57	0.643178	0.6844	0.667053	0.718757	0.692905
WP_002964333.1	220	OmpA family protein	0.562	0.909901	0.715	0.943677	0.750893	0.847285
WP_004683739.1	236	porin family protein	0.562	0.758413	0.5458	0.786566	0.573199	0.679882
WP_002964666.1	227	OmpW family protein	0.558	0.964208	0.5768	1	0.605755	0.802878
WP_002965482.1	439	sugar ABC transporter substrate-binding protein	0.557	0.800794	0.4671	0.83052	0.490548	0.660534
WP_004690357.1	284	porin family protein	0.553	0.669913	0.7673	0.694781	0.805818	0.750299
WP_004683466.1	213	membrane protein	0.55	0.240098	0.8212	0.249011	0.862424	0.555717
WP_002971090.1	267	hypothetical protein	0.547	0.671545	0.6612	0.696473	0.694392	0.695433
WP_002964611.1	351	DUF1176 domain-containing protein	0.546	0.793744	0.5366	0.823208	0.563537	0.693373
WP_002969562.1	155	hypothetical protein	0.544	0.809882	0.6365	0.839945	0.668452	0.754199
WP_002966226.1	182	hypothetical protein	0.54	0.335187	0.4879	0.347629	0.512392	0.430011
WP_004691650.1	620	TonB-dependent receptor	0.537	0.905643	0.6549	0.939261	0.687776	0.813518
WP_002964530.1	287	outer membrane protein assembly factor BamD	0.526	0.650735	0.7504	0.674891	0.78807	0.73148
WP_023080793.1	661	heme transporter BhuA	0.518	0.811642	0.6011	0.841771	0.631275	0.736523
WP_004681306.1	367	iron ABC transporter substrate-binding protein	0.516	0.923882	0.4799	0.958177	0.503991	0.731084
WP_004690579.1	429	cell wall hydrolase	0.514	0.672117	0.4026	0.697066	0.42281	0.559938
WP_011068938.1	792	LPS-assembly protein LptD	0.509	0.756992	0.3146	0.785092	0.330393	0.557742
WP_002963597.1	121	hypothetical protein	0.502	0.88846	0.5064	0.92144	0.531821	0.726631
WP_006278325.1	261	hypothetical protein	0.502	0.785869	0.5356	0.815041	0.562487	0.688764

## Sheet: Cumulative T-cell
NCBI ID	Length	NCBI-Description	Adhesion Probability (vaxign)	MHC-I (Propred I) No. of Alleles in query	MHC-I Density (Sum epitopes/47 (Alleles)/length)	MHC-II (Propred II) No. of Alleles in query	MHC-II Density (Sum epitopes/47 (Alleles)/length)	MHC-I	MHC-II	allele counts for both MHC (98)	Allele coverage
WP_002963780.1	216	hypothetical protein	0.706	47	0.0284673	44	0.00844227	0.848373	0.342188	91	0.928571
WP_002966352.1	156	DUF2271 domain-containing protein	0.701	47	0.0320513	47	0.0123177	0.955182	0.499272	94	0.959184
WP_002971481.1	168	outer membrane protein assembly factor BamE	0.693	47	0.0306484	49	0.0163399	0.913375	0.6623	96	0.979592
WP_002964998.1	177	hypothetical protein	0.679	46	0.0292102	48	0.00985931	0.870514	0.399625	94	0.959184
WP_004681227.1	238	type IV secretion system protein virB1	0.666	46	0.0309315	51	0.0223266	0.921811	0.904958	97	0.989796
WP_002966502.1	126	hypothetical protein	0.627	47	0.0298886	51	0.0197635	0.890729	0.801067	98	1
WP_004691134.1	403	hypothetical protein	0.623	47	0.0286152	51	0.0162993	0.85278	0.660656	98	1
WP_004683944.1	212	porin family protein	0.62	47	0.0291048	50	0.0119312	0.867371	0.483604	97	0.989796
WP_002963776.1	115	DUF2147	0.609	45	0.0290472	45	0.0138107	0.865655	0.559787	90	0.918367
WP_002967296.1	166	BA14K family protein	0.602	47	0.0228147	51	0.0201984	0.679915	0.818698	98	1
WP_002966849.1	280	DUF1849 domain-containing protein	0.6	47	0.031307	51	0.0226891	0.933001	0.919651	98	1
WP_004688070.1	192	hypothetical protein	0.596	47	0.0301418	51	0.0193015	0.898277	0.782342	98	1
WP_002964322.1	329	hypothetical protein	0.592	47	0.0333053	51	0.0182967	0.992554	0.741615	98	1
WP_004684144.1	274	porin family protein	0.59	47	0.0322255	51	0.0231859	0.960374	0.939789	98	1
WP_002964622.1	170	BA14K family protein	0.588	47	0.024781	50	0.0153403	0.738515	0.621783	97	0.989796
WP_002964719.1	261	porin family protein	0.57	47	0.0309774	51	0.0152505	0.923179	0.618147	98	1
WP_002964333.1	220	OmpA family protein	0.562	47	0.0330754	50	0.0127451	0.985703	0.516594	97	0.989796
WP_004683739.1	236	porin family protein	0.562	47	0.0312838	51	0.0181123	0.93231	0.734143	98	1
WP_002964666.1	227	OmpW family protein	0.558	47	0.0335552	51	0.0200397	1	0.812266	98	1
WP_002965482.1	439	sugar ABC transporter substrate-binding protein	0.557	47	0.0315999	50	0.0168386	0.941729	0.682516	97	0.989796
WP_004690357.1	284	porin family protein	0.553	47	0.0314654	51	0.0202983	0.937721	0.822744	98	1
WP_004683466.1	213	membrane protein	0.55	47	0.0316652	51	0.014913	0.943675	0.604465	98	1
WP_002971090.1	267	hypothetical protein	0.547	47	0.0325922	51	0.0174047	0.971303	0.705461	98	1
WP_002964611.1	351	DUF1176 domain-containing protein	0.546	47	0.0343699	51	0.0201106	1.02428	0.815138	98	1
WP_002969562.1	155	hypothetical protein	0.544	47	0.0308854	51	0.0218849	0.920436	0.887055	98	1
WP_002966226.1	182	hypothetical protein	0.54	47	0.0319149	51	0.0246714	0.951117	1	98	1
WP_004691650.1	620	TonB-dependent receptor	0.537	47	0.0322924	51	0.0155281	0.962367	0.629399	98	1
WP_002964530.1	287	outer membrane protein assembly factor BamD	0.526	47	0.0309882	51	0.0088816	0.923501	0.359996	98	1
WP_023080793.1	661	heme transporter BhuA	0.518	47	0.0301284	51	0.0151879	0.897878	0.615608	98	1
WP_004681306.1	367	iron ABC transporter substrate-binding protein	0.516	47	0.0309583	51	0.0120746	0.92261	0.489416	98	1
WP_004690579.1	429	cell wall hydrolase	0.514	47	0.0300055	51	0.0173225	0.894213	0.70213	98	1
WP_011068938.1	792	LPS-assembly protein LptD	0.509	47	0.0267032	51	0.0177263	0.7958	0.718495	98	1
WP_002963597.1	121	hypothetical protein	0.502	47	0.033937	50	0.0189596	1.01138	0.768487	97	0.989796
WP_006278325.1	261	hypothetical protein	0.502	46	0.0264938	50	0.0122455	0.789561	0.496344	96	0.979592

## Sheet: Cumulative B-cell
NCBI ID	Length	NCBI-Description	Adhesion Probability (vaxign)	B-Cell Density (BCPred) Density:N/length		B-Cell Density (AAP) Density:N/length		BCPred normalization	AAP normalization	overall B cell density
WP_002963780.1	216	hypothetical protein	0.706	5	0.0231481	6	0.0277778	0.704733	0.801587	0.75316
WP_002966352.1	156	DUF2271 domain-containing protein	0.701	4	0.025641	4	0.025641	0.780627	0.739927	0.760277
WP_002971481.1	168	outer membrane protein assembly factor BamE	0.693	4	0.0238095	4	0.0238095	0.724868	0.687075	0.705971
WP_002964998.1	177	hypothetical protein	0.679	5	0.0282486	5	0.0282486	0.860013	0.815174	0.837593
WP_004681227.1	238	type IV secretion system protein virB1	0.666	7	0.0294118	6	0.0252101	0.895425	0.727491	0.811458
WP_002966502.1	126	hypothetical protein	0.627	2	0.015873	3	0.0238095	0.483245	0.687075	0.58516
WP_004691134.1	403	hypothetical protein	0.623	10	0.0248139	9	0.0223325	0.755445	0.644452	0.699949
WP_004683944.1	212	porin family protein	0.62	5	0.0235849	5	0.0235849	0.718029	0.680593	0.699311
WP_002963776.1	115	DUF2147	0.609	2	0.0173913	3	0.026087	0.529469	0.752795	0.641132
WP_002967296.1	166	BA14K family protein	0.602	4	0.0240964	4	0.0240964	0.733601	0.695353	0.714477
WP_002966849.1	280	DUF1849 domain-containing protein	0.6	4	0.0142857	7	0.025	0.434921	0.721429	0.578175
WP_004688070.1	192	hypothetical protein	0.596	4	0.0208333	6	0.03125	0.634259	0.901786	0.768022
WP_002964322.1	329	hypothetical protein	0.592	5	0.0151976	8	0.0243161	0.462682	0.701693	0.582187
WP_004684144.1	274	porin family protein	0.59	9	0.0328467	7	0.0255474	1	0.737226	0.868613
WP_002964622.1	170	BA14K family protein	0.588	3	0.0176471	4	0.0235294	0.537255	0.678992	0.608123
WP_002964719.1	261	porin family protein	0.57	4	0.0153257	3	0.0114943	0.466582	0.331691	0.399136
WP_002964333.1	220	OmpA family protein	0.562	4	0.0181818	5	0.0227273	0.553535	0.655844	0.60469
WP_004683739.1	236	porin family protein	0.562	4	0.0169492	6	0.0254237	0.516008	0.733656	0.624832
WP_002964666.1	227	OmpW family protein	0.558	3	0.0132159	3	0.0132159	0.402349	0.381372	0.391861
WP_002965482.1	439	sugar ABC transporter substrate-binding protein	0.557	9	0.0205011	10	0.022779	0.624146	0.657338	0.640742
WP_004690357.1	284	porin family protein	0.553	9	0.0316901	5	0.0176056	0.964789	0.508048	0.736419
WP_004683466.1	213	membrane protein	0.55	3	0.0140845	6	0.028169	0.428795	0.812877	0.620836
WP_002971090.1	267	hypothetical protein	0.547	6	0.0224719	6	0.0224719	0.684145	0.648475	0.66631
WP_002964611.1	351	DUF1176 domain-containing protein	0.546	7	0.019943	8	0.022792	0.607154	0.657713	0.632433
WP_002969562.1	155	hypothetical protein	0.544	2	0.0129032	3	0.0193548	0.392832	0.558525	0.475678
WP_002966226.1	182	hypothetical protein	0.54	5	0.0274725	5	0.0274725	0.836386	0.792779	0.814582
WP_004691650.1	620	TonB-dependent receptor	0.537	13	0.0209677	13	0.0209677	0.638351	0.605069	0.62171
WP_002964530.1	287	outer membrane protein assembly factor BamD	0.526	4	0.0139373	6	0.0209059	0.424313	0.603285	0.513799
WP_023080793.1	661	heme transporter BhuA	0.518	18	0.0272315	14	0.02118	0.829047	0.611195	0.720121
WP_004681306.1	367	iron ABC transporter substrate-binding protein	0.516	7	0.0190736	10	0.027248	0.580684	0.786298	0.683491
WP_004690579.1	429	cell wall hydrolase	0.514	10	0.02331	9	0.020979	0.709661	0.605395	0.657528
WP_011068938.1	792	LPS-assembly protein LptD	0.509	14	0.0176768	13	0.0164141	0.538159	0.473665	0.505912
WP_002963597.1	121	hypothetical protein	0.502	1	0.00826446	3	0.0247934	0.251607	0.715466	0.483537
WP_006278325.1	261	hypothetical protein	0.502	7	0.0268199	7	0.0268199	0.816518	0.773946	0.795232

## Sheet: CD-NCBI
Query	Hit type	From	To	E-Value	Bitscore	Accession	Short name	Incomplete	Superfamily
Q#2 - WP_002966352.1	specific	24	140	3.10616e-41	136.942	pfam10029	DUF2271	-	cl21544
Q#3 - WP_002971481.1	specific	8	154	1.92614e-56	177.212	COG2913	BamE	-	cl19285
Q#4 - WP_002964998.1	specific	86	175	1.32814e-22	88.5378	pfam02974	Inh	-	cl03811
Q#5 - WP_004681227.1	superfamily	7	165	4.00396e-21	89.1483	cl00222	lysozyme_like superfamily	C	-
Q#7 - WP_004691134.1	specific	2	299	3.56147e-135	392.951	COG3034	YafK	-	cl21614
Q#7 - WP_004691134.1	superfamily	238	396	0.00599733	38.6772	cl26386	DNA_pol3_gamma3 superfamily	NC	-
Q#8 - WP_004683944.1	specific	40	212	1.14319e-25	100.534	COG3637	LomR	-	cl21487
Q#10 - WP_002963776.1	specific	1	115	6.72552e-22	86.3671	COG4731	COG4731	N	cl01951
Q#11 - WP_002967296.1	specific	134	163	9.05106e-13	60.1561	pfam07886	BA14K	-	cl06774
Q#12 - WP_002966849.1	specific	31	270	7.57784e-116	336.919	pfam08904	DUF1849	-	cl07482
Q#14 - WP_002964322.1	specific	28	326	1.12593e-129	377.056	TIGR02122	TRAP_TAXI	-	cl26668
Q#15 - WP_004684144.1	specific	11	256	2.67936e-31	117.098	COG3637	LomR	-	cl21487
Q#16 - WP_002964622.1	specific	139	168	2.71613e-10	53.2225	pfam07886	BA14K	-	cl06774
Q#17 - WP_002964719.1	specific	9	261	1.77111e-35	127.884	COG3637	LomR	-	cl21487
Q#18 - WP_002964333.1	specific	77	216	4.35521e-59	187.749	COG2885	OmpA	N	cl28145
Q#19 - WP_004683739.1	specific	31	236	6.48609e-41	141.366	COG3637	LomR	-	cl21487
Q#20 - WP_002964666.1	specific	43	227	4.48979e-83	249.966	COG3047	OmpW	-	cl21487
Q#21 - WP_002965482.1	specific	42	429	4.18155e-56	193.005	cd13585	PBP2_TMBP_like	-	cl21456
Q#23 - WP_004690357.1	specific	1	283	9.46082e-34	124.032	COG3637	LomR	-	cl21487
Q#25 - WP_004683466.1	specific	5	213	1.74116e-41	142.136	COG3637	LomR	-	cl21487
Q#26 - WP_002971090.1	superfamily	189	267	5.8238e-05	43.0689	cl21487	OM_channels superfamily	N	-
Q#27 - WP_002964611.1	specific	32	349	6.04136e-91	278.874	pfam06674	DUF1176	-	cl05951
Q#29 - WP_002966226.1	specific	1	178	3.77768e-104	300.562	COG3470	Tpd	-	cl01377
Q#30 - WP_004691650.1	specific	21	620	0	757.343	COG4206	BtuB	-	cl26861
Q#31 - WP_002964530.1	specific	17	267	3.97292e-117	340.83	COG4105	BamD	-	cl26155
Q#33 - WP_023080793.1	superfamily	38	655	7.14731e-67	234.209	cl26861	CirA superfamily	-	-
Q#34 - WP_004681306.1	specific	56	365	1.05715e-59	197.658	COG1840	AfuA	-	cl25412
Q#35 - WP_004690579.1	specific	180	429	2.06386e-109	326.317	COG3773	CwlJ	-	cl26889
Q#36 - WP_011068938.1	specific	7	791	0	725.363	COG1452	LptD	-	cl27152
Q#37 - WP_002963597.1	specific	27	121	3.71127e-40	132.625	COG3895	MliC	-	cl01604
Q#38 - WP_006278325.1	superfamily	78	164	4.80469e-06	47.0164	cl26386	DNA_pol3_gamma3 superfamily	NC	-

## Sheet: Annotation
NCBI ID	Length	NCBI Description	Blannotator	PANNZER	EggNoc
WP_002963776.1	115	DUF2147	putative protein without homology	sn-glycerol-3-phosphate ABC transporter ATP-binding protein	Uncharacterized protein conserved in bacteria (DUF2147)
WP_002963597.1	121	hypothetical protein	Membrane-bound lysozyme inhibitor of C-type lysozyme	Membrane-bound lysozyme inhibitor of C-type lysozyme	Membrane-bound lysozyme-inhibitor of c-type lysozyme
WP_002966502.1	126	hypothetical protein	Outer membrane lipoprotein omp10	Outer membrane protein 10	Outer membrane lipoprotein
WP_002969562.1	155	hypothetical protein	putative protein without homology	Uncharacterized protein	_
WP_002966352.1	156	DUF2271 domain-containing protein	putative protein without homology	Tat pathway signal protein	Predicted periplasmic protein (DUF2271)
WP_002967296.1	166	BA14K family protein	putative protein without homology	Immunoreactive protein BA14k	BA14K family
WP_002971481.1	168	outer membrane protein assembly factor BamE	putative protein without homology	Outer membrane protein assembly factor BamE	smpa omla domain-containing protein
WP_002964622.1	170	BA14K family protein	putative protein without homology	Glutelin	BA14K-like protein
WP_002964998.1	177	hypothetical protein	Outer membrane lipoprotein omp19	Outer membrane lipoprotein omp19	Outer membrane lipoprotein
WP_002966226.1	182	hypothetical protein	UPF0423 protein BAB2_0840	Pathogen-specific membrane antigen	Periplasmic Protein
WP_004688070.1	192	hypothetical protein	putative protein without homology	Uncharacterized protein	NA
WP_004683944.1	212	porin family protein	putative protein without homology	Outer-membrane protein Omp25	membrAne
WP_004683466.1	213	membrane protein	25 kDa outer-membrane immunogenic protein	Outer membrane protein 25	membrAne
WP_002963780.1	216	hypothetical protein	putative protein without homology	Uncharacterized protein	NA
WP_002964333.1	220	OmpA family protein	Probable lipoprotein YiaD	Cell envelope biogenesis protein OmpA	Ompa motb domain protein
WP_002964666.1	227	OmpW family protein	Uncharacterized outer-membrane protein y4mB	OmpW family outer membrane protein	outer membrane protein W
WP_004683739.1	236	porin family protein	putative protein without homology	Autotransporter outer membrane beta-barrel domain-containing protein (Fragment)	hemin binding protein
WP_004681227.1	238	type IV secretion system protein virB1	Type IV secretion system protein virB1	Type IV secretion system protein virB1	Conjugal transfer protein
WP_002964719.1	261	porin family protein	31 kDa outer-membrane immunogenic protein	Outer membrane protein Omp31	Outer membrane protein Omp31
WP_006278325.1	261	hypothetical protein	putative protein without homology	Proline-rich region:Proline-rich extensin
WP_002971090.1	267	hypothetical protein	putative protein without homology	Outer membrane beta-barrel domain protein	NA
WP_004684144.1	274	porin family protein	putative protein without homology	Porin opacity type	heat resistant agglutinin 1
WP_002966849.1	280	DUF1849 domain-containing protein	putative protein without homology	ATP/GTP-binding site domain-containing protein A	Domain of unknown function (DUF1849)
WP_004690357.1	284	porin family protein	Uncharacterized protein BRA0921/BS1330_II0913	Heat resistant agglutinin 1	heat resistant agglutinin 1
WP_002964530.1	287	outer membrane protein assembly factor BamD	Outer membrane protein assembly factor BamD	Outer membrane protein assembly factor BamD	Part of the outer membrane protein assembly complex, which is involved in assembly and insertion of beta-barrel proteins into the outer membrane
WP_002964322.1	329	hypothetical protein	31 kDa immunogenic protein	Alkanesulfonate transporter substrate-binding subunit	trap transporter solute receptor taxi family
WP_002964611.1	351	DUF1176 domain-containing protein	putative protein without homology	Uncharacterized protein	Protein of unknown function (DUF1176)
WP_004681306.1	367	iron ABC transporter substrate-binding protein	putative protein without homology	Periplasmic binding ABC transporter	solute-binding protein
WP_004691134.1	403	hypothetical protein	Putative L,D-transpeptidase YafK	Pollen allergen Poa pIX/Phl pVI	ErfK ybiS ycfS ynhG family protein
WP_004690579.1	429	cell wall hydrolase	putative protein without homology	Cell wall hydrolyses involved in spore germination	Cell wall hydrolase
WP_002965482.1	439	sugar ABC transporter substrate-binding protein	putative protein without homology	ABC-type sugar transport system periplasmic component	extracellular solute-binding protein family 1
WP_004691650.1	620	TonB-dependent receptor	putative protein without homology	Iron compound TonB-dependent receptor	Involved in the active translocation of vitamin B12 (cyanocobalamin) across the outer membrane to the periplasmic space. It derives its energy for transport by interacting with the trans-periplasmic membrane protein TonB (By similarity)
WP_023080793.1	661	heme transporter BhuA	Heme transporter BhuA	Heme transporter bhuA	receptor
WP_011068938.1	792	LPS-assembly protein LptD	putative protein without homology	LPS-assembly protein LptD	involved in the assembly of LPS in the outer leaflet of the outer membrane. Determines N-hexane tolerance and is involved in outer membrane permeability. Essential for envelope biogenesis (By similarity)
